# Supplementary material for: Self-Phosphorylated Polybenzimidazole: An Environmentally Friendly and Economical Approach for Hydrogen/Air High-Temperature Polymer-Electrolyte Membrane Fuel Cells
Source: MDPI journal article supplement (doi:10.3390/membranes13060552), 2023-05-25
Supplement: s1 [file s1]

## Supplementary Materials

### *N'*-bis(3-methoxyphenyl)-4,6-dinitro-1,3-benzenediamine

Melting point (m.p.) 146–147 °C. Elemental analysis: calc. C 58.54; H 4.42; N 13.65. C<sub>20</sub>H<sub>18</sub>N<sub>4</sub>O<sub>6</sub> M-410.4. Found C 58.43; H 4.45; N 13.48.

<sup>1</sup>H NMR (400 MHz, DMSO-*d*<sub>6</sub>) δ 9.03 (s, 1H), 7.26 (t, 2H), 6.88 (m, 4H), 6.77 (dd, 2H), 6.49 (s, 2H), 3.72 (s, 6H)

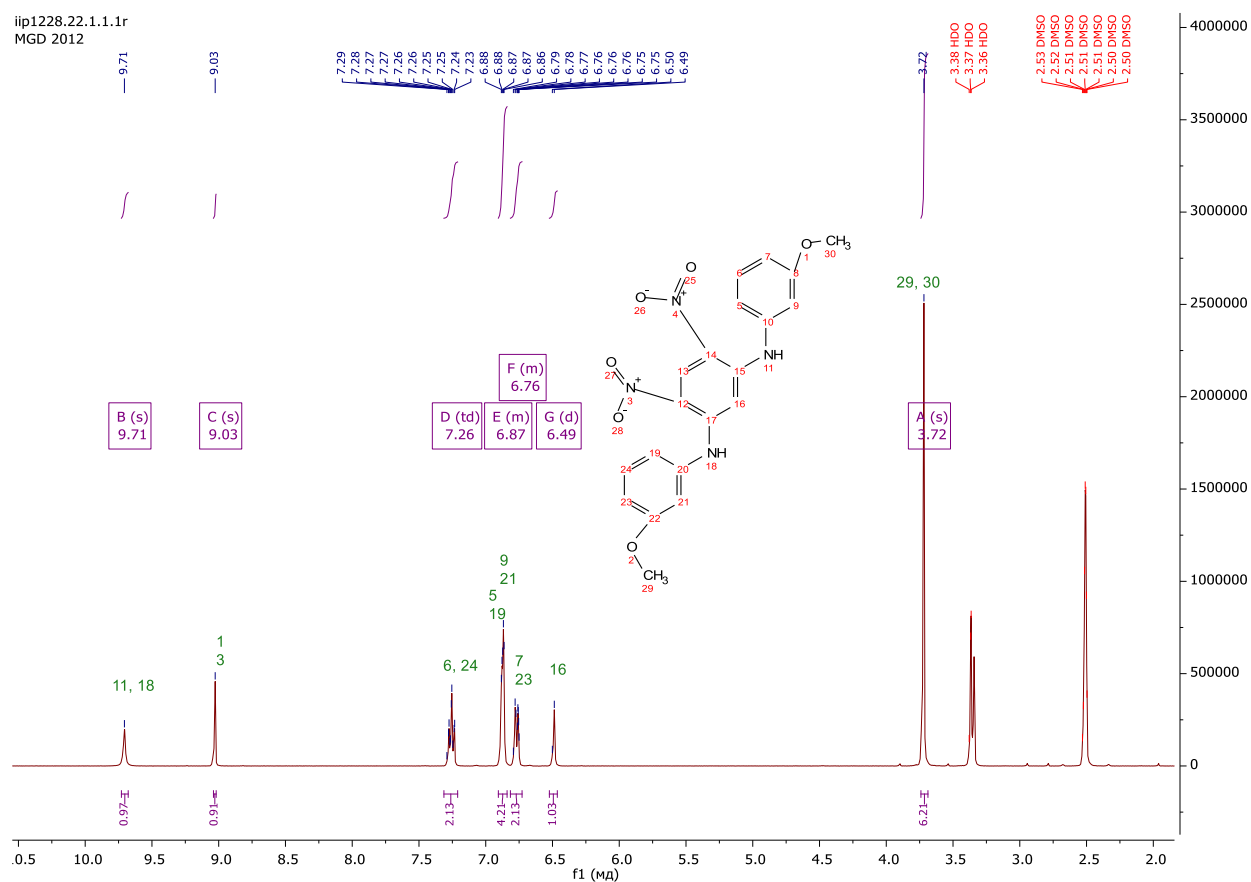

**Figure S1.** <sup>1</sup>H NMR of *N'*-bis(3-methoxyphenyl)-4,6-dinitro-1,3-benzenediamine.

$N^1,N^5$ -bis(3-methoxyphenyl)-1,2,4,5-benzenetetramine (**1**)

Melting point (m.p.) 189-191 °C. Elemental analysis: calc. C 58.54; H 4.42; N 13.65.

$C_{20}H_{22}N_4O_2$ . M 350.42. Found C 68.55; H 6.33; N 15.99.

$^1H$  NMR (400 MHz,  $DMSO-d_6$ )  $\delta$  6.94 (t,  $J = 8.0$  Hz, 2H), 6.86 (s, 2H), 6.58 (s, 1H), 6.20 – 6.08 (m, 7H), 4.47 (s, 4H), 3.62 (s, 6H).

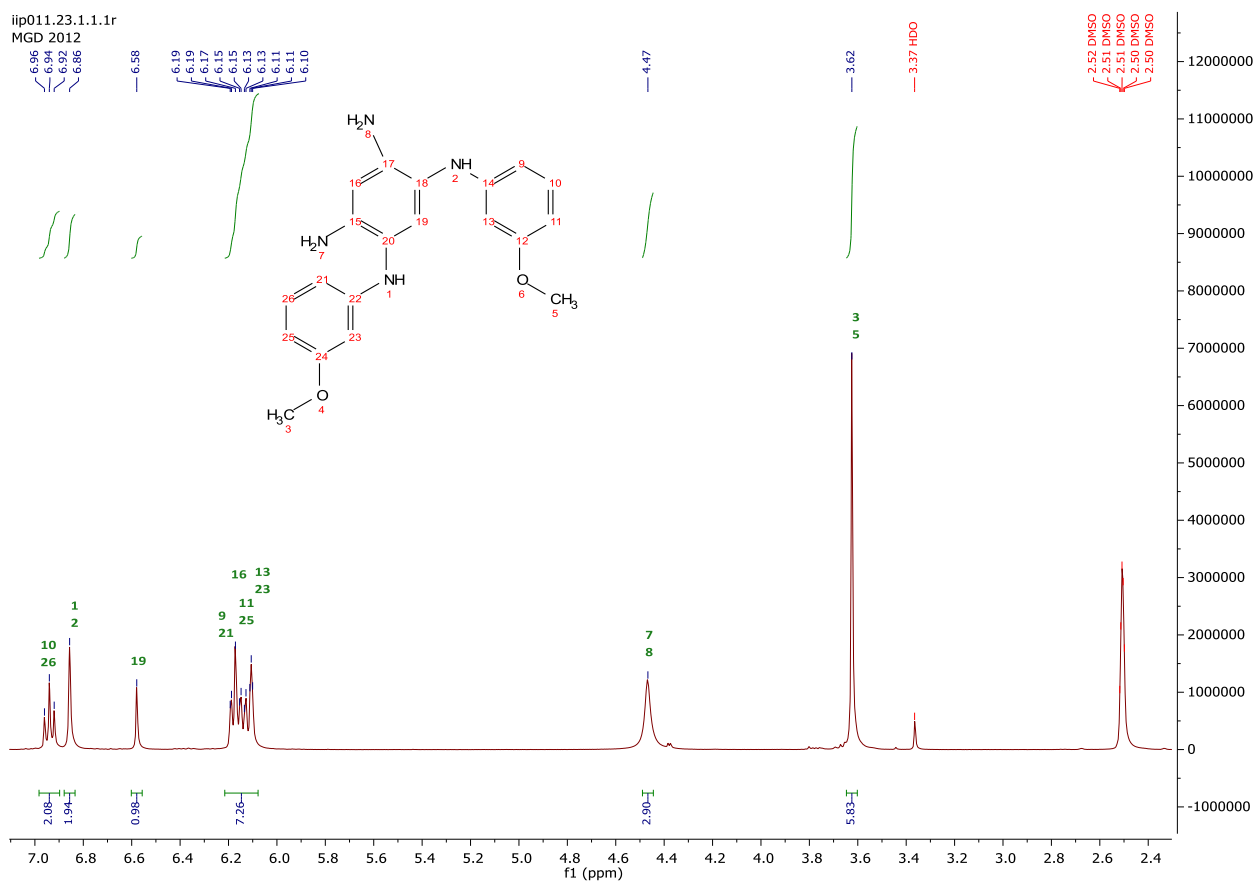

**Figure S2.**  $^1H$  NMR of  $N^1,N^5$ -bis(3-methoxyphenyl)-1,2,4,5-benzenetetramine (**1**).

$N^2,N^4$ -bis(*p*-trifluorobenzoyl)- $N^1,N^5$ -bis(3-methoxyphenyl)-1,2,4,5-benzenetetramine (**2**)

Melting point (m.p.) 201-204 °C. Elemental analysis: calc. C 62.25; H 4.06; F 16.41 N 8.09. C<sub>36</sub>H<sub>28</sub>F<sub>6</sub>N<sub>4</sub>O<sub>4</sub>. M 694.6. Found C 62.33; H 4.16; F 16.31 N 8.04.

<sup>1</sup>H NMR (400 MHz, DMSO-*d*<sub>6</sub>) δ 9.96 (s, 1H), 8.13 (d, *J* = 8.1 Hz, 4H), 7.89 (d, *J* = 8.2 Hz, 4H), 7.70 (s, 1H), 7.57 (s, 1H), 7.23 (s, 1H), 7.10 (t, *J* = 8.1 Hz, 2H), 6.62 – 6.55 (m, 2H), 6.51 (s, 2H), 6.38 (dd, *J* = 8.3, 2.4 Hz, 2H), 3.68 (s, 6H).

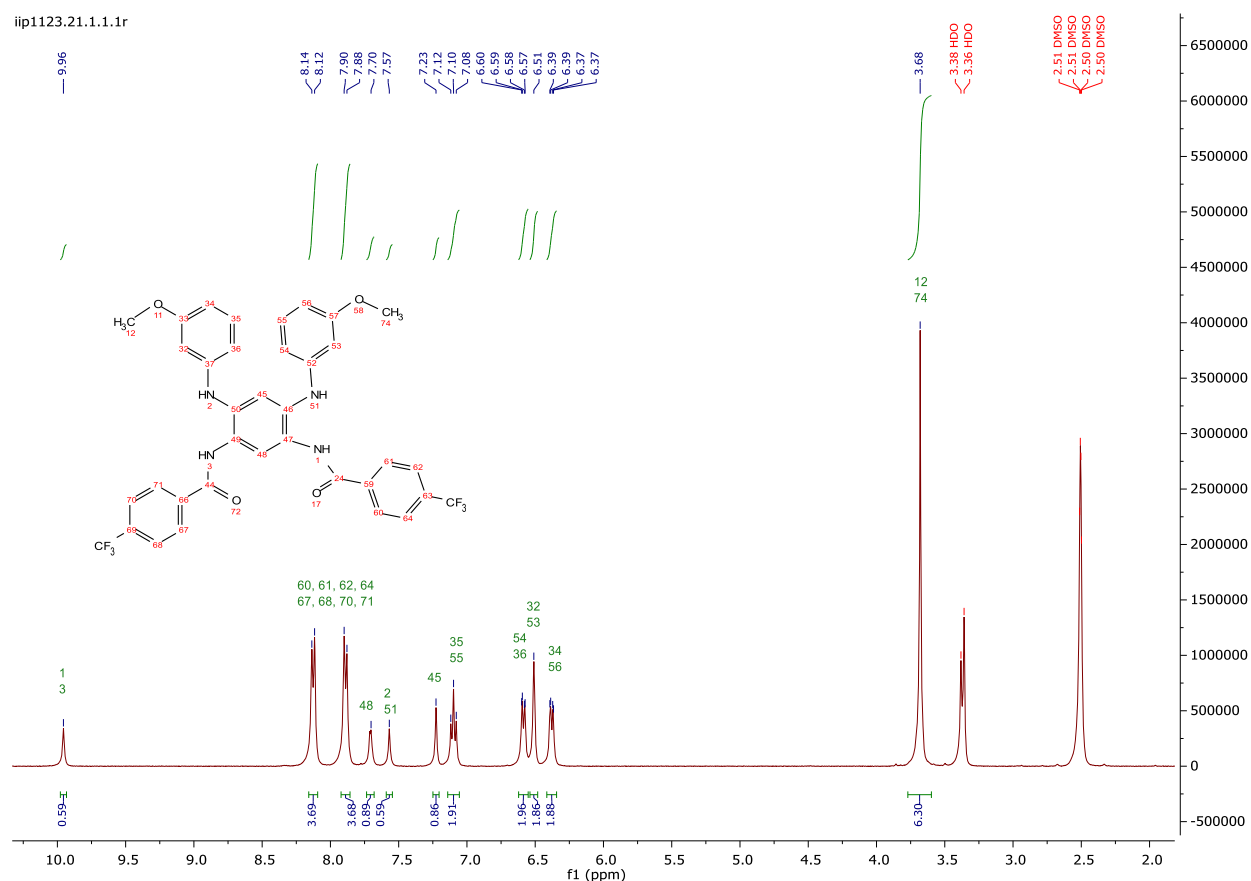

**Figure S3.** <sup>1</sup>H NMR of  $N^2,N^4$ -bis(*p*-trifluorobenzoyl)- $N^1,N^5$ -bis(3-methoxyphenyl)-1,2,4,5-benzenetetramine (**2**).

Reduced viscosity  $\eta_{\text{red}}$  0.83 dL/g (25°C, 0.5 g/dL, NMP). GPC (NMP):  $M_n$  103 kDa,  $M_w$  185 kDa (PDI 1.8).

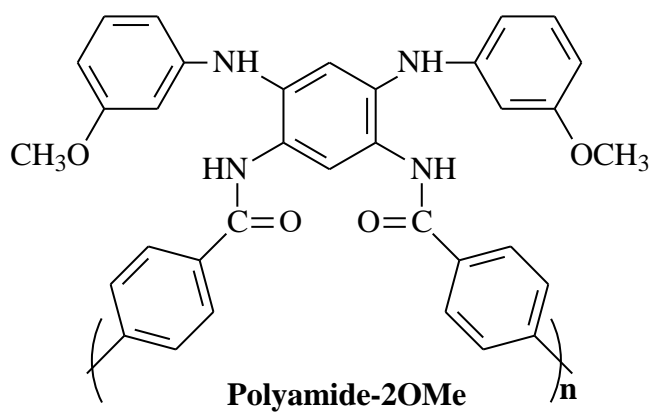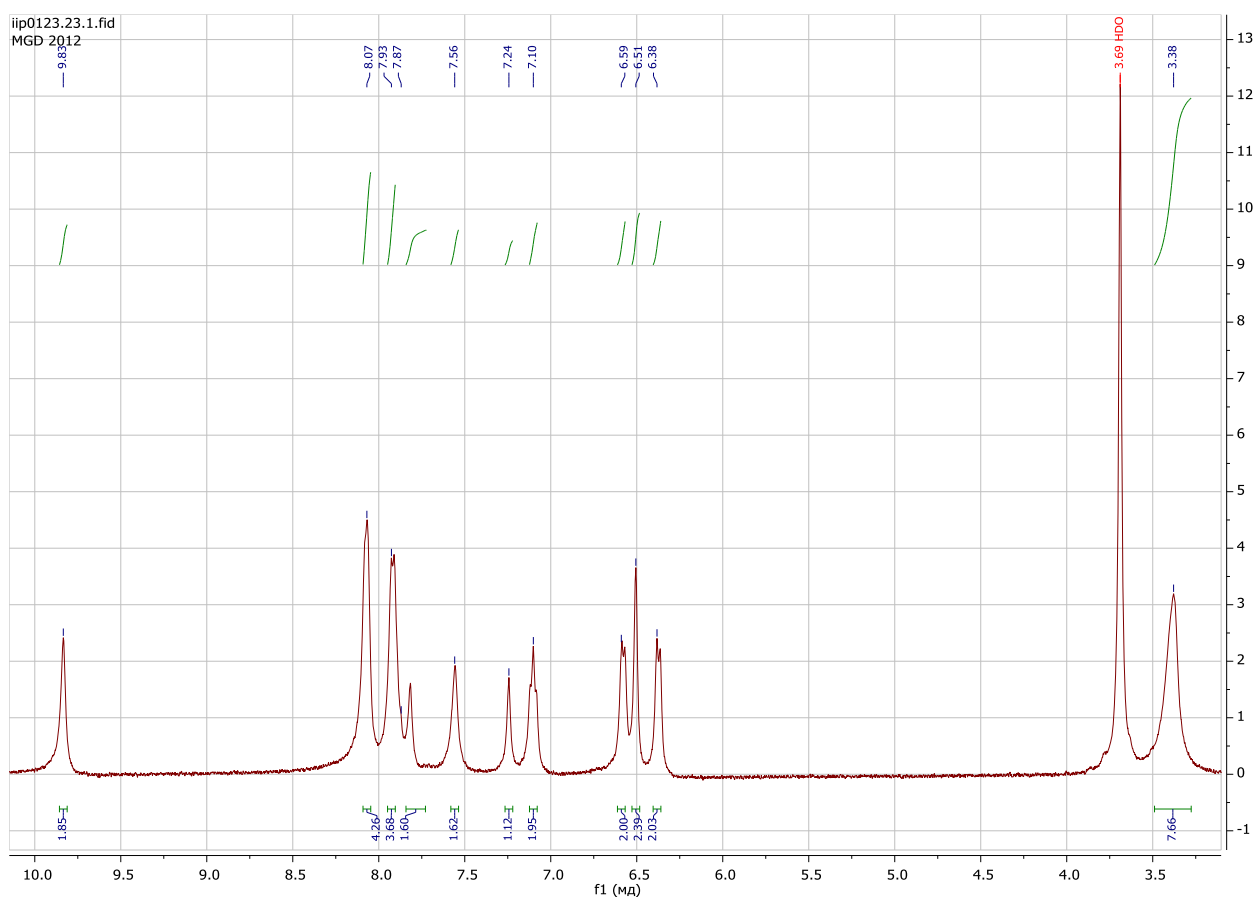

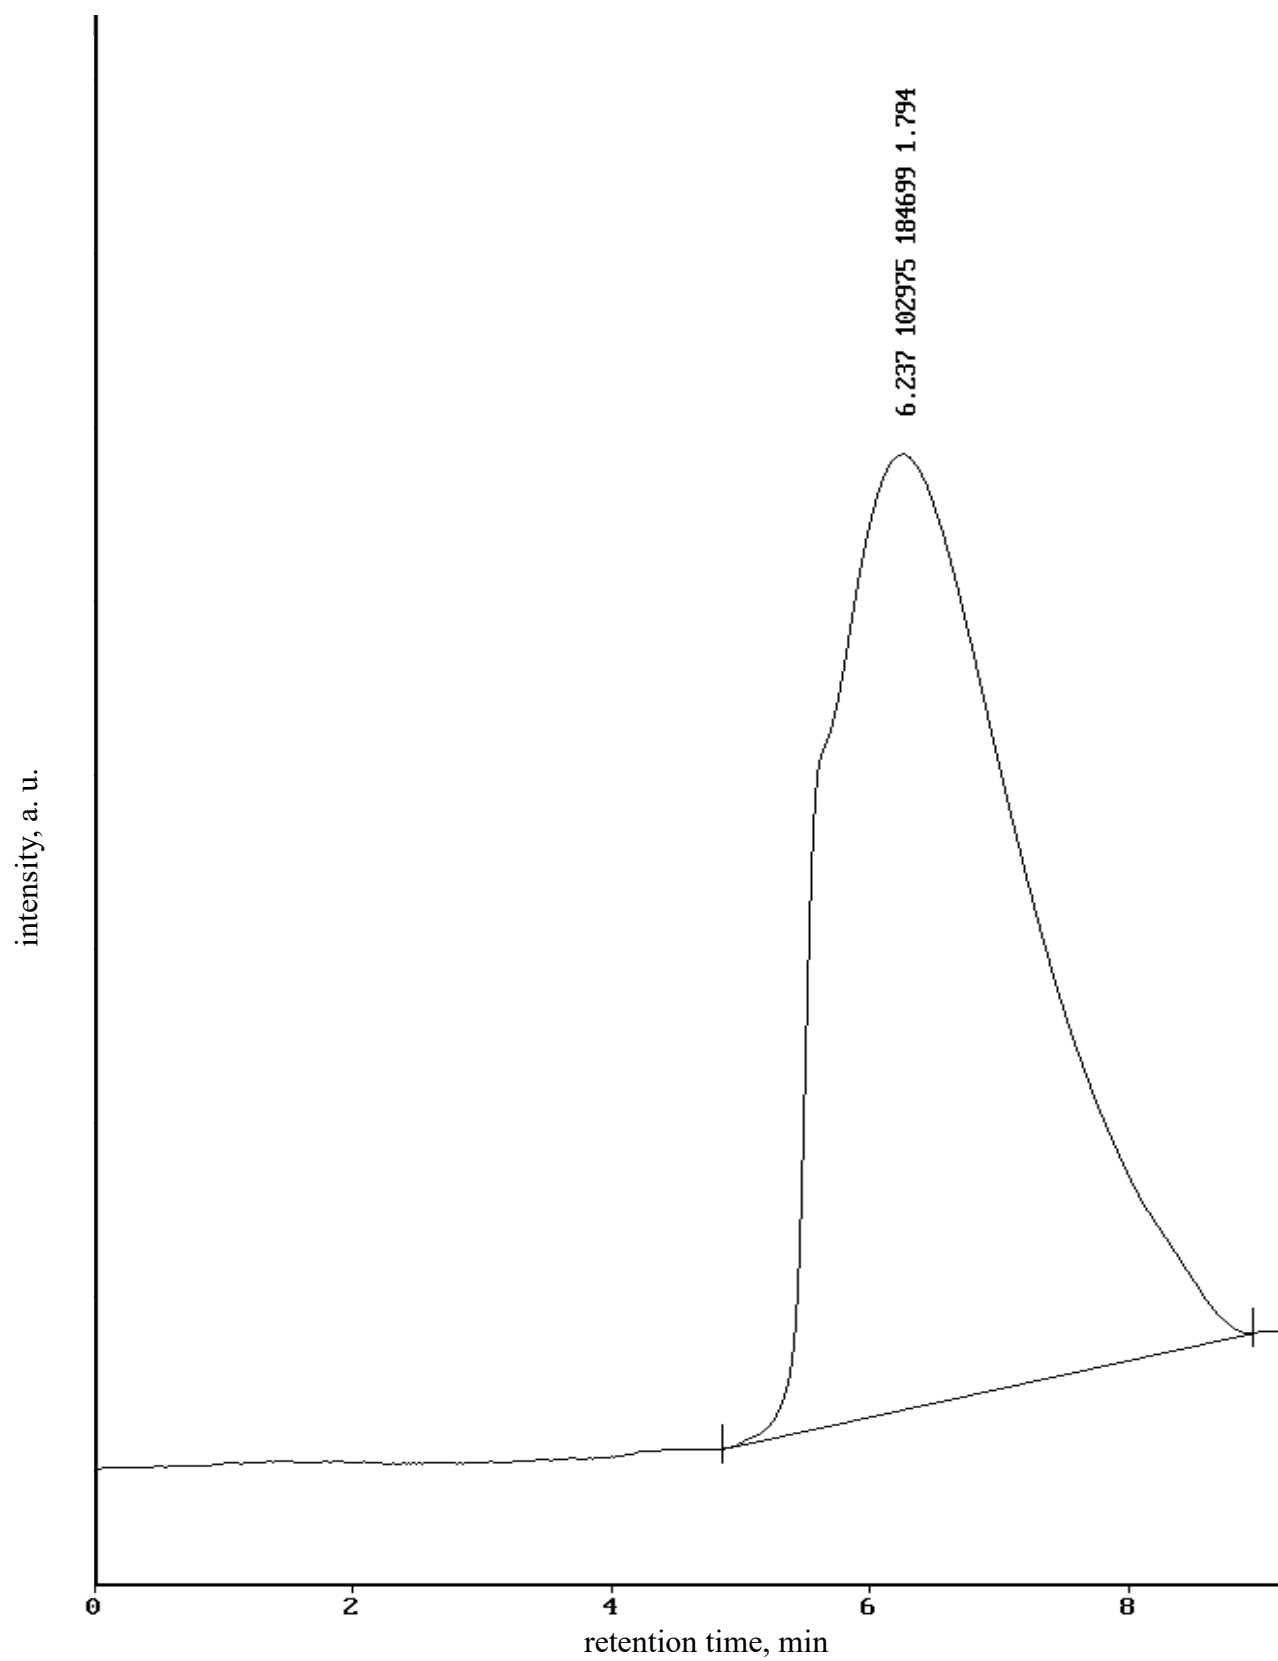

**Figure S5.** GPC of polyamide (**4**) in NMP.

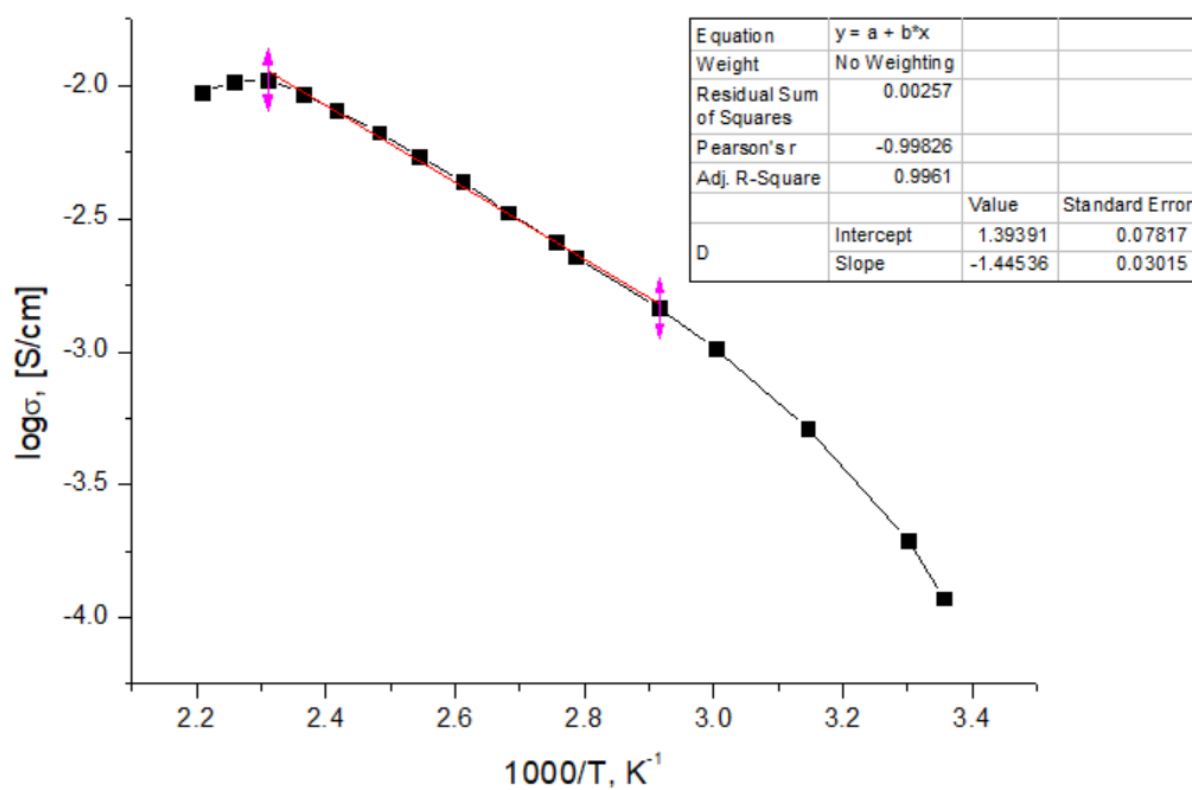

**Figure S6.** Arrhenius plot for PBI-OMe.

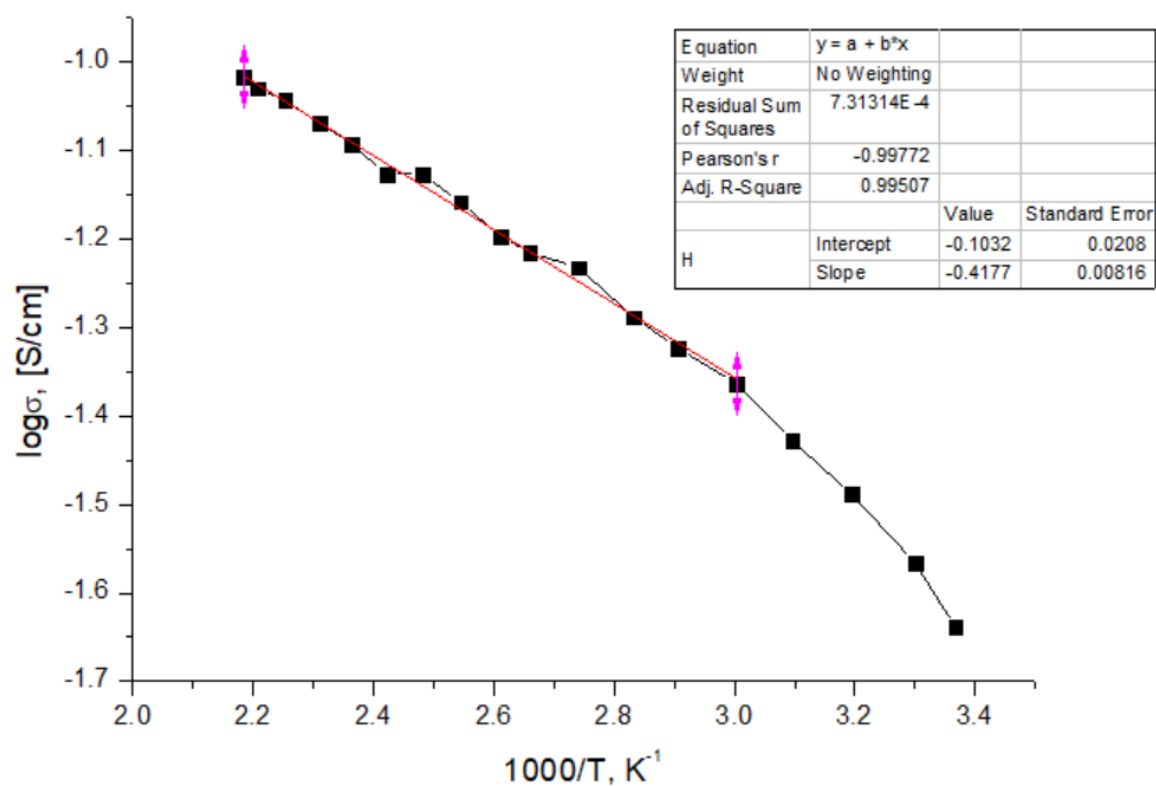

**Figure S7.** Arrhenius plot for PBI-OP.
